# Supplementary material for: Plant-Derived and Dietary Hydroxybenzoic Acids—A Comprehensive Study of Structural, Anti-/Pro-Oxidant, Lipophilic, Antimicrobial, and Cytotoxic Activity in MDA-MB-231 and MCF-7 Cell Lines
Source: MDPI journal article supplement (doi:10.3390/nu13093107), 2021-09-04
Supplement: s1 [file s1]

# **Plant derived and dietary hydroxybenzoic acids – a comprehensive study of structural, anti-/pro-oxidant, lipophilic, antimicrobial and cytotoxic activity in MDA-MB-231 and MCF-7 cell lines**

**Monika Kalinowska<sup>1,\*</sup>, Ewelina Gołębiewska<sup>1</sup>, Grzegorz Świdorski<sup>1</sup>, Sylwia Męczyńska-Wielgosz<sup>2</sup>, Hanna Lewandowska<sup>3</sup>, Anna Pietryczuk<sup>4</sup>, Adam Cudowski<sup>4</sup>, Aleksander Astel<sup>5</sup>, Renata Świsłocka<sup>1</sup>, Mariola Samsonowicz<sup>1</sup>, Anna Barbara Złowodzka<sup>6</sup>, Waldemar Priebe<sup>7</sup> and Włodzimierz Lewandowski<sup>8</sup>**

<sup>1</sup> Department of Chemistry, Biology and Biotechnology, Institute of Civil Engineering and Energetics, Faculty of Civil Engineering and Environmental Science, Białystok University of Technology, Wiejska 45E Street, 15-351 Białystok, Poland; m.kalinowska@pb.edu.pl (M.K.); e.golebiewska@pb.edu.pl (E.G.); g.swiderski@pb.edu.pl (G.Ś.); r.swislocka@pb.edu.pl (R.Ś.); m.samsonowicz@pb.edu.pl (M.S.); bzlowodzka@gmail.com (A.B.Z.); w-lewando@wp.pl (W.L.)

<sup>2</sup> Centre of Radiobiology and Biological Dosimetry, Institute of Nuclear Chemistry and Technology, Dorodna 16 Street, 03-195 Warsaw, Poland; s.meczynska@ichtj.waw.pl (S.M.W.)

<sup>3</sup> Institute of Nuclear Chemistry and Technology, 16 Dorodna street, 03-195, Warsaw, Poland; h.lewandowska@ichtj.waw.pl (H.L.)

<sup>4</sup> Department of Water Ecology, Faculty of Biology, University of Białystok, Ciolkowskiego 1J Street, 15-245 Białystok, Poland; annapiet@uwb.edu.pl (A.P.); cudad@uwb.edu.pl (A.C.)

<sup>5</sup> Environmental Chemistry Research Unit, Institute of Biology and Earth Sciences, Pomeranian University in Słupsk, Arciszewskiego 22a Street, 76-200 Słupsk, Poland; aleksander.astel@apsl.edu.pl (A.A.)

<sup>6</sup> Faculty of Chemistry, Warsaw University of Technology, Noakowskiego 3 Street, 00-664 Warszawa; bzlowodzka@gmail.com (A.B.Z.)

<sup>7</sup> Department of Experimental Therapeutics, The University of Texas MD Anderson Cancer Center, 1901 East Rd., Houston, TX 77054, USA; wpriebe@mac.com (W.P.)

<sup>8</sup> Institute of Agricultural and Food Biotechnology – State Research Institute, Warsaw, Poland; w-lewando@wp.pl (W.L.)

\*Correspondence: m.kalinowska@pb.edu.pl (M.K.)

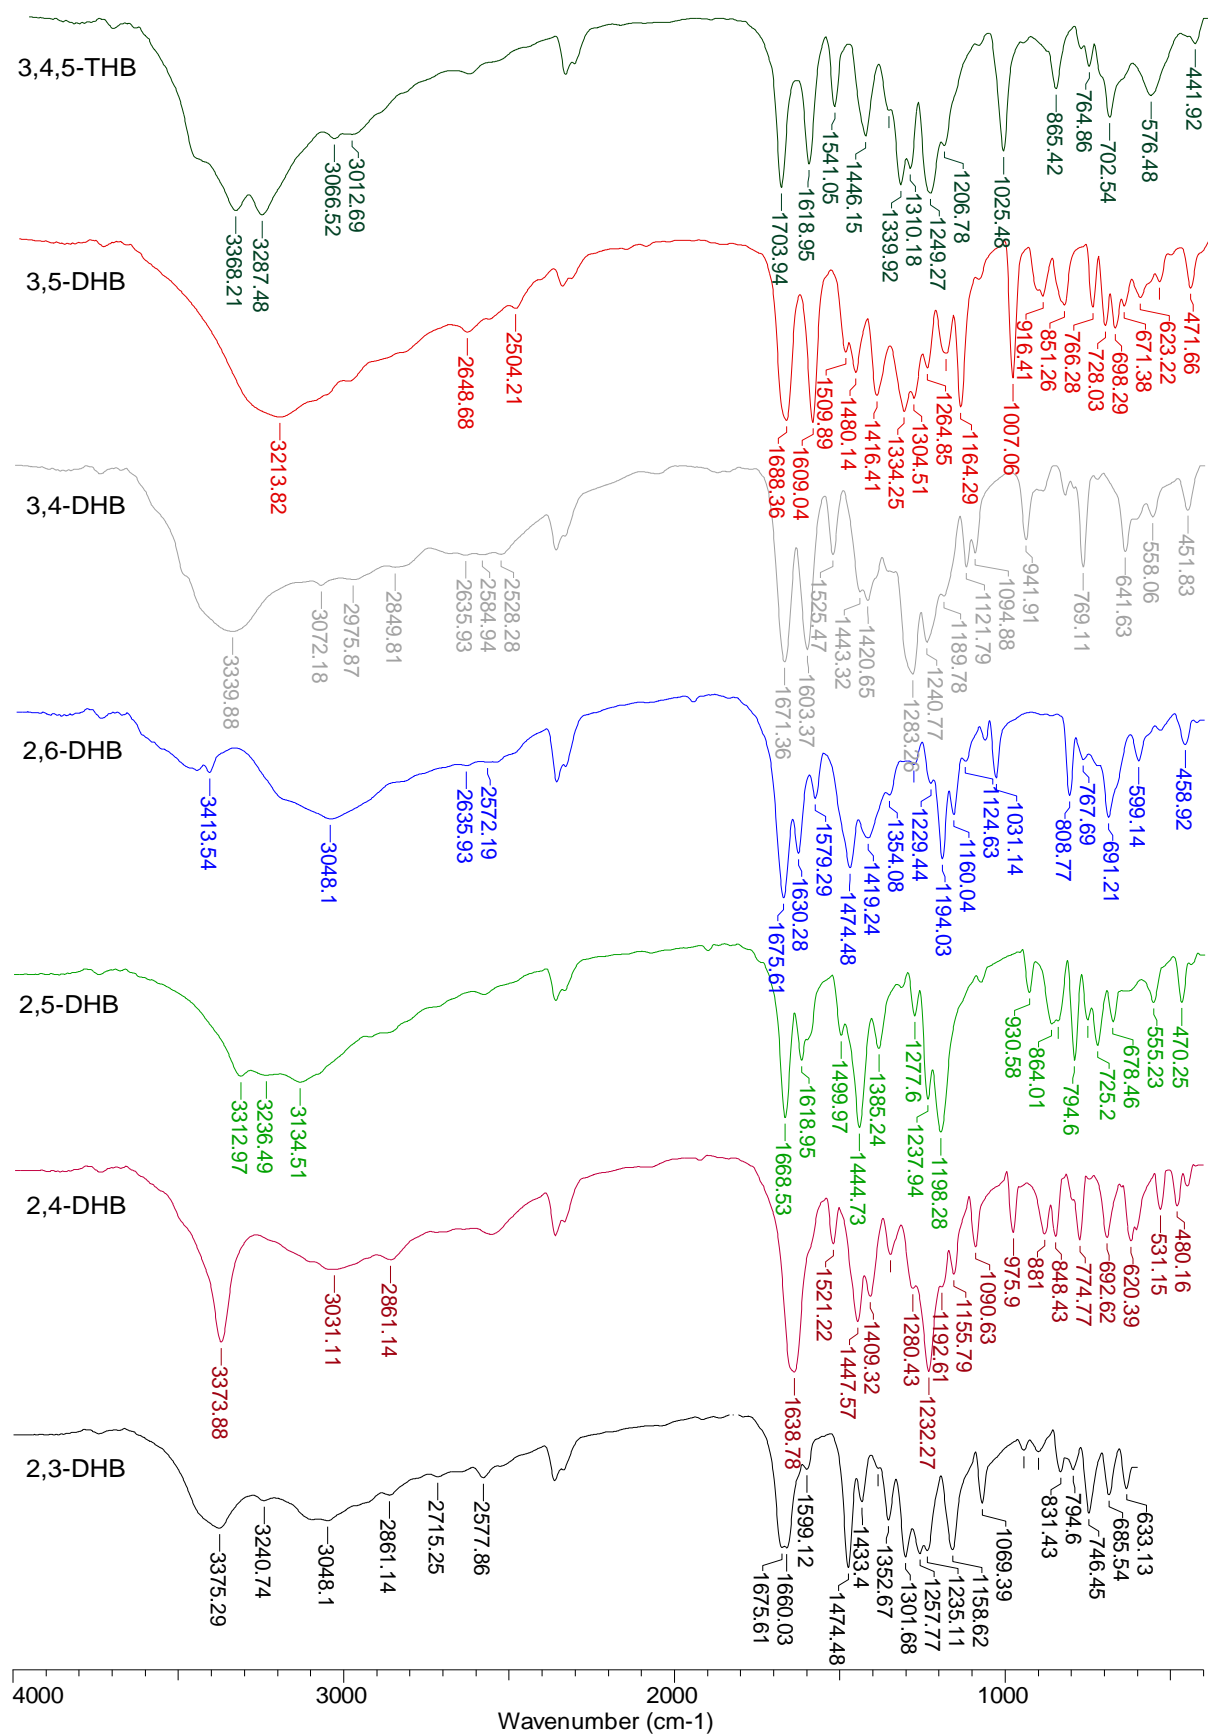

**Figure S1.** The FT-IR spectra of hydroxybenzoic acids.

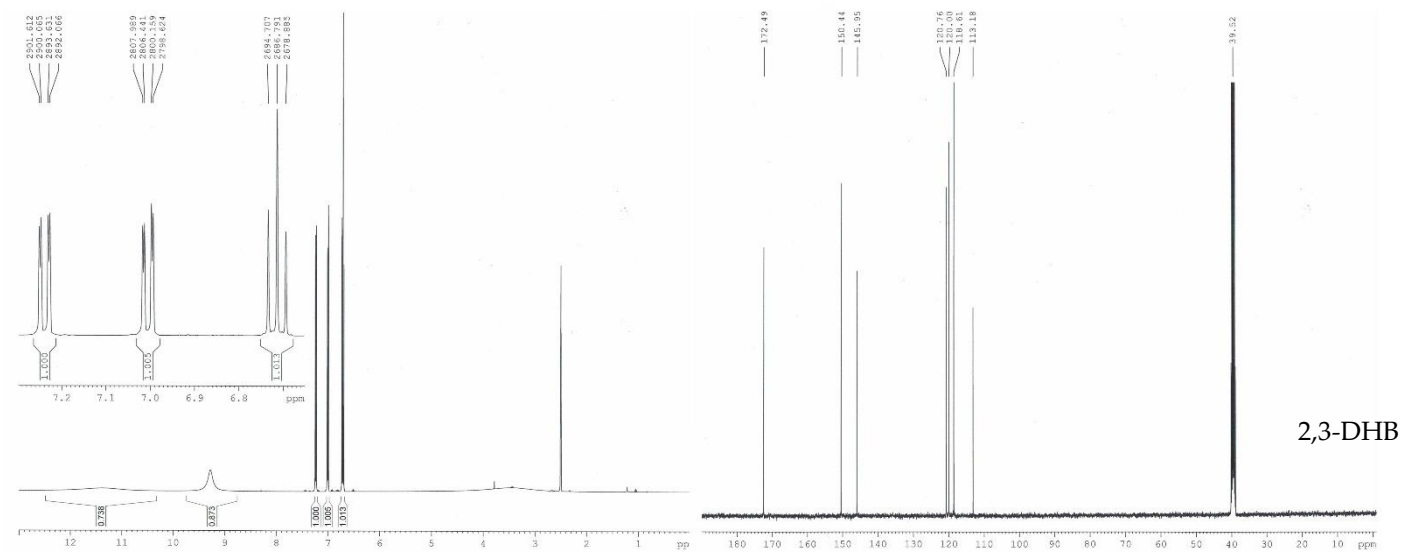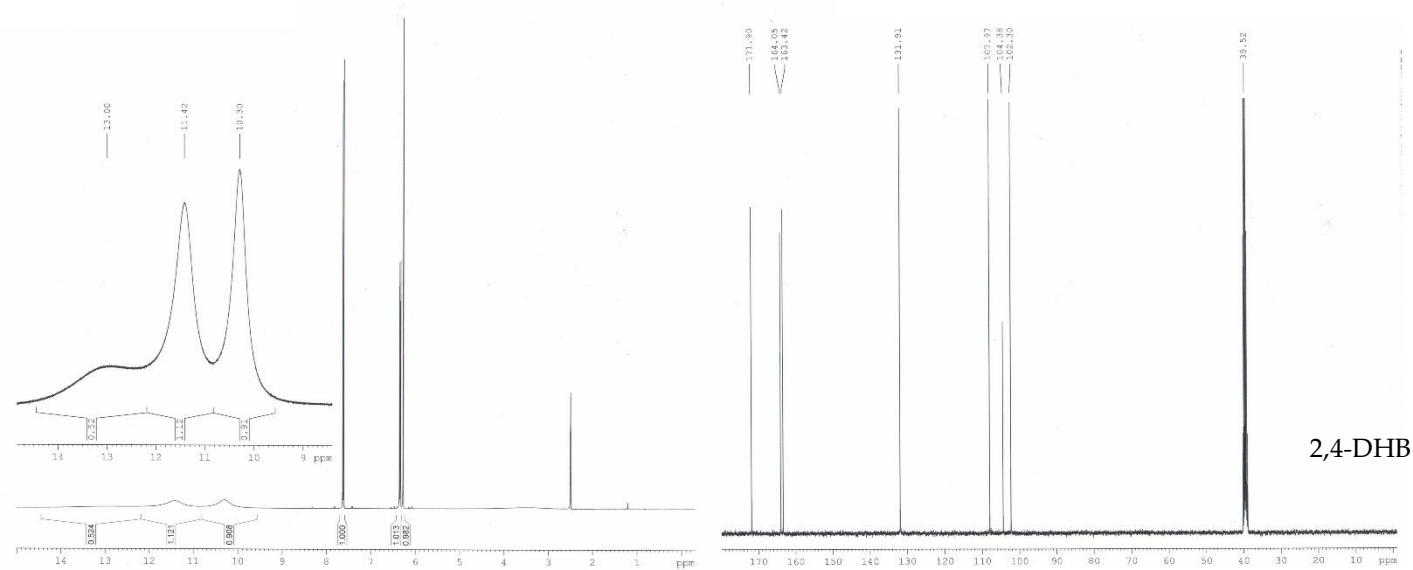

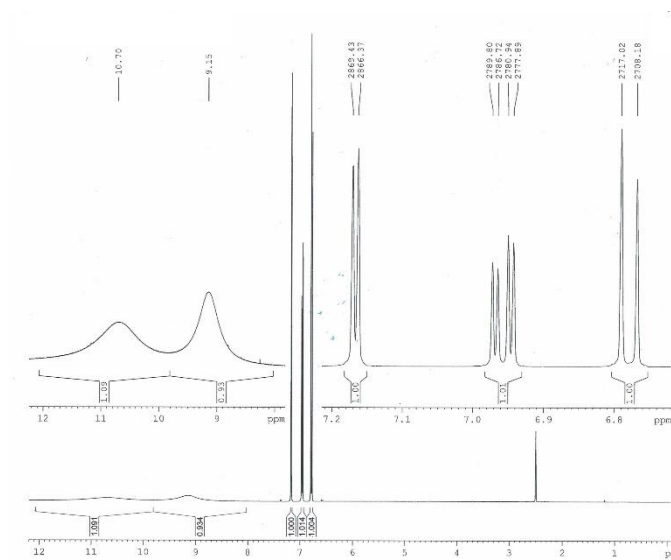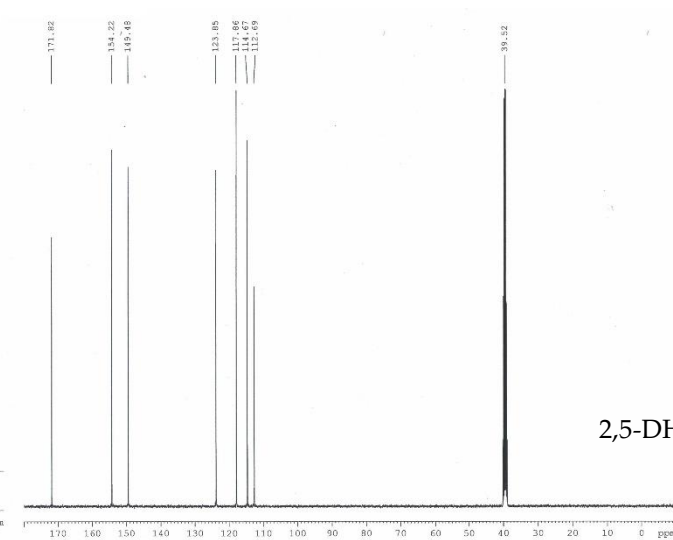

2,5-DHB

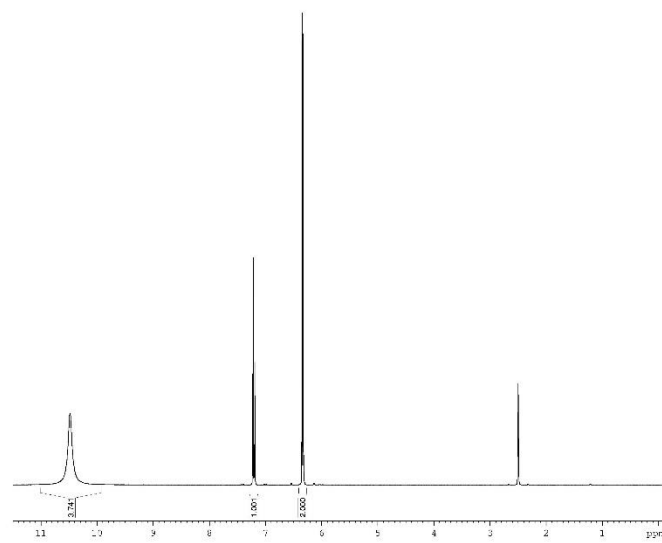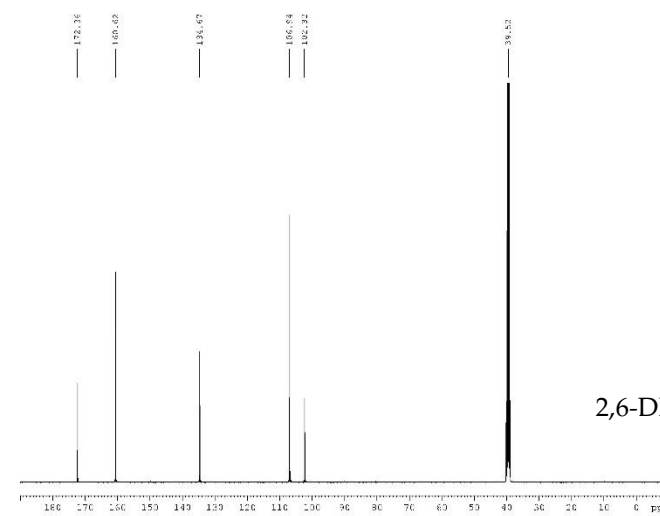

2,6-DHB

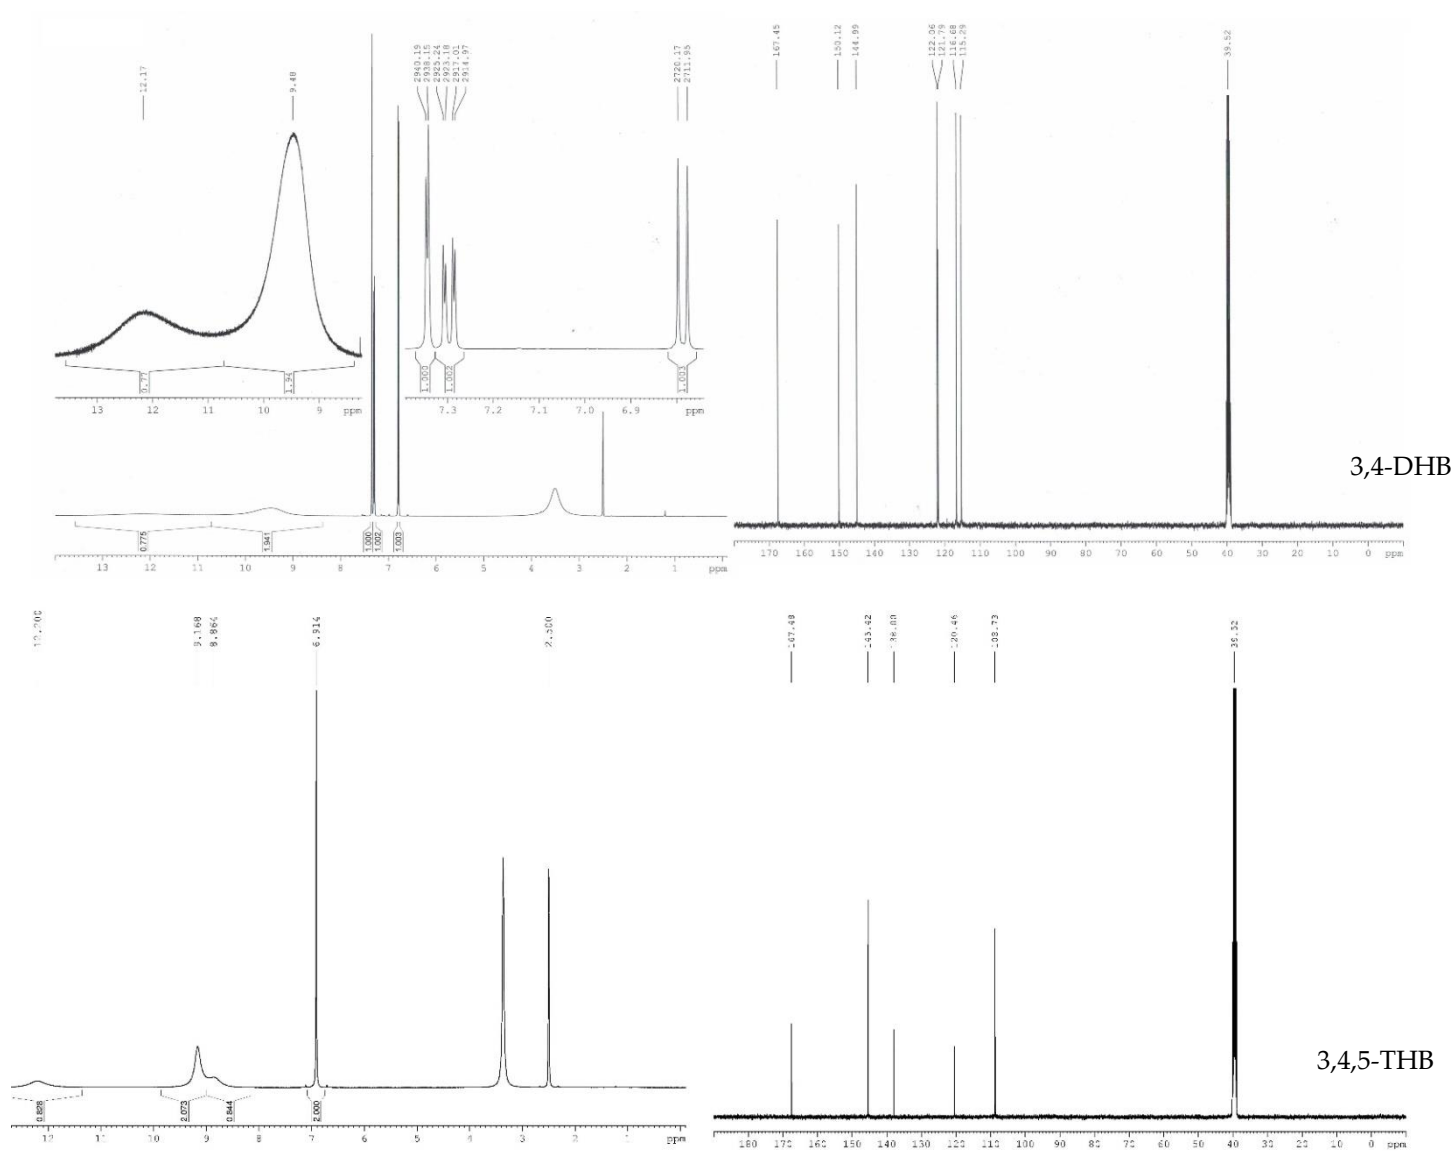

**Figure S2.**  $^1\text{H}$  and  $^{13}\text{C}$  NMR spectra of hydroxybenzoic acids. Data for 3,5-DHB come from the literature [114].

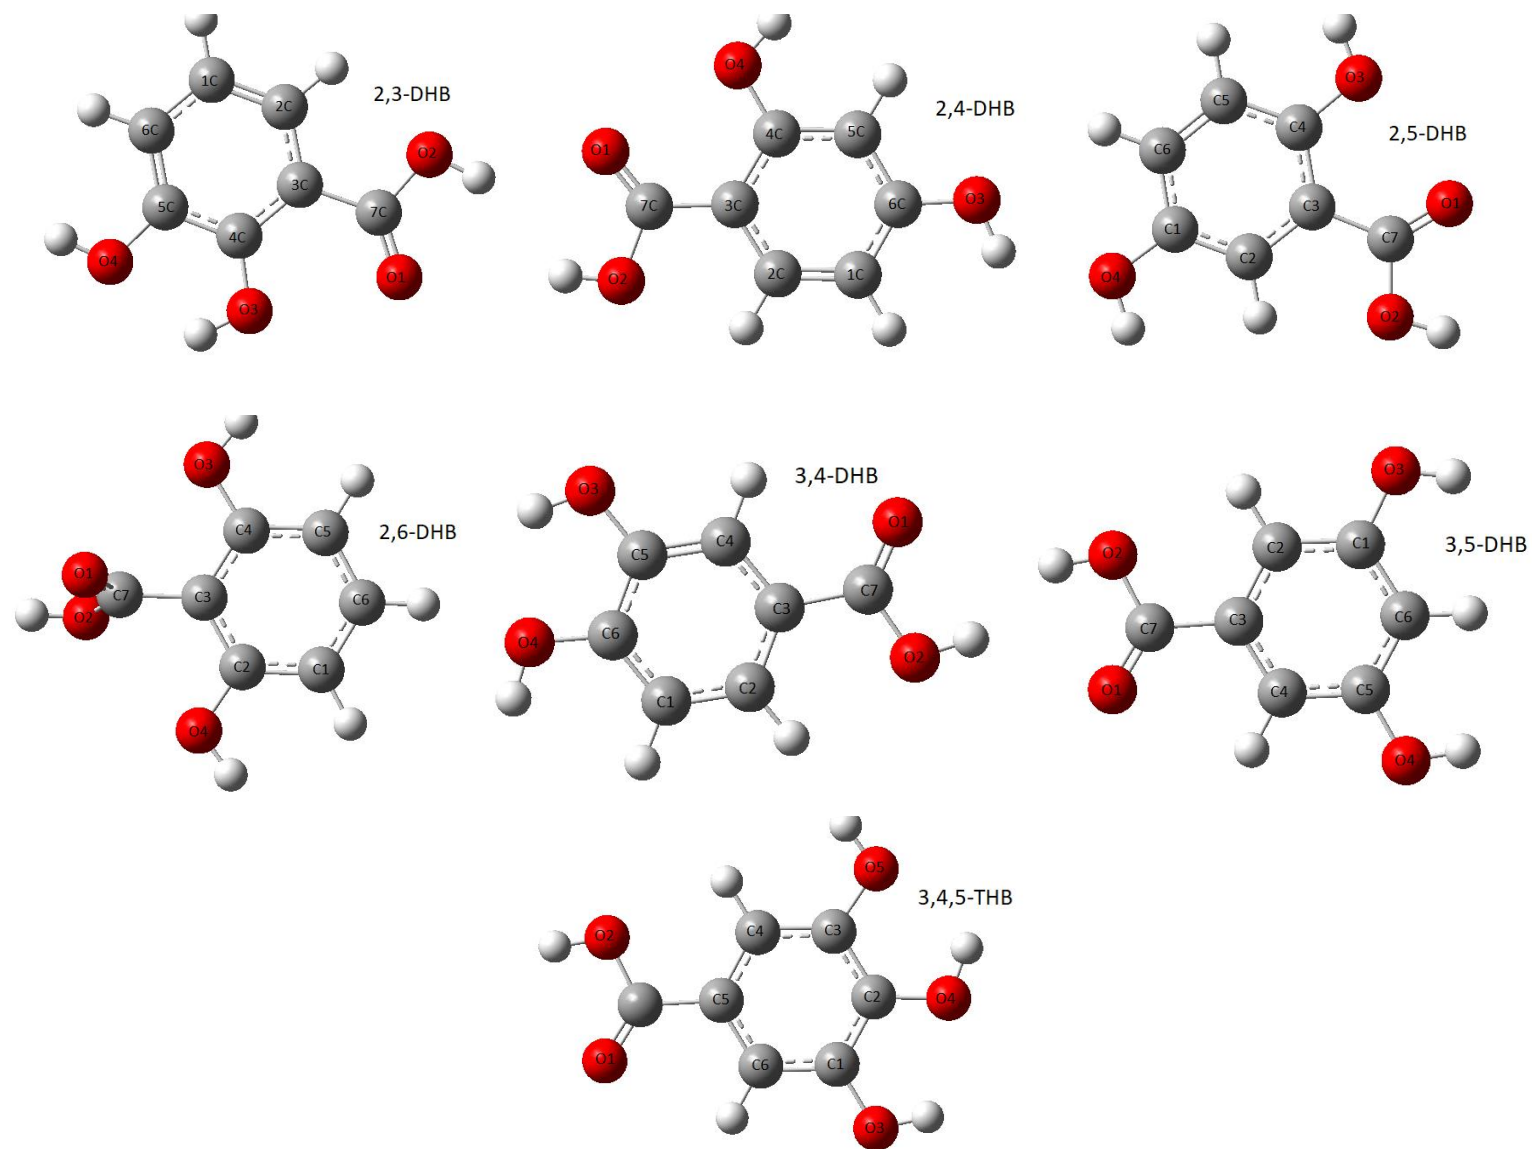

Figure S3. The atom numbering scheme.

**Table S1.** Person's correlation matrix ( $p < 0.05$ ) of different theoretical and experimental logP and pK<sub>a</sub> parameters.

|                               | <b>LogP<sub>C18</sub></b> | <b>LogP<sub>C8</sub></b> | <b>LogP<sub>CN</sub></b> | <b>LogP<sub>IAM</sub></b> | <b>LogP<sub>PHE</sub></b> | <b>LogP<sub>Classic</sub></b> | <b>LogP<sub>Galas</sub></b> | <b>pK<sub>a1</sub></b> | <b>pK<sub>a2</sub></b> | <b>pK<sub>a3</sub></b> | <b>LogP<sub>exp</sub></b> |
|-------------------------------|---------------------------|--------------------------|--------------------------|---------------------------|---------------------------|-------------------------------|-----------------------------|------------------------|------------------------|------------------------|---------------------------|
| <b>LogP<sub>C18</sub></b>     | 1.000                     |                          |                          |                           |                           |                               |                             |                        |                        |                        |                           |
| <b>LogP<sub>C8</sub></b>      | 0.527                     | 1.000                    |                          |                           |                           |                               |                             |                        |                        |                        |                           |
| <b>LogP<sub>CN</sub></b>      | 0.493                     | 0.697                    | 1.000                    |                           |                           |                               |                             |                        |                        |                        |                           |
| <b>LogP<sub>IAM</sub></b>     | 0.459                     | 0.813                    | 0.241                    | 1.000                     |                           |                               |                             |                        |                        |                        |                           |
| <b>LogP<sub>PHE</sub></b>     | 0.199                     | 0.879                    | 0.813                    | 0.544                     | 1.000                     |                               |                             |                        |                        |                        |                           |
| <b>LogP<sub>Classic</sub></b> | 0.821                     | 0.629                    | 0.169                    | 0.766                     | 0.186                     | 1.000                         |                             |                        |                        |                        |                           |
| <b>LogP<sub>Galas</sub></b>   | 0.882                     | 0.641                    | 0.364                    | 0.629                     | 0.253                     | 0.943                         | 1.000                       |                        |                        |                        |                           |
| <b>pK<sub>a1</sub></b>        | -0.784                    | -0.430                   | -0.033                   | -0.645                    | 0.033                     | -0.953                        | -0.919                      | 1.000                  |                        |                        |                           |
| <b>pK<sub>a2</sub></b>        | 0.677                     | 0.150                    | -0.166                   | 0.504                     | -0.280                    | 0.804                         | 0.749                       | -0.905                 | 1.000                  |                        |                           |
| <b>pK<sub>a3</sub></b>        | 0.291                     | 0.750                    | 0.065                    | 0.925                     | 0.477                     | 0.730                         | 0.594                       | -0.600                 | 0.432                  | 1.000                  |                           |
| <b>LogP<sub>exp</sub></b>     | 0.774                     | 0.544                    | 0.254                    | 0.598                     | 0.166                     | 0.892                         | 0.965                       | -0.918                 | 0.806                  | 0.597                  | 1.000                     |

**Table S2.** Calculated parameters of chemical reactivity of tested hydroxybenzoic acids in gas, aqueous and methanolic phases.

| Parameters [eV]                         | Compound |         |         |         |         |         |           |
|-----------------------------------------|----------|---------|---------|---------|---------|---------|-----------|
|                                         | 2,3-DHB  | 2,4-DHB | 2,5-DHB | 2,6-DHB | 3,4-DHB | 3,5-DHB | 3,4,5-THB |
| <b>Gas phase</b>                        |          |         |         |         |         |         |           |
| $E_{\text{HOMO}}$                       | -8.9204  | -9.2813 | -8.7787 | -9.2462 | -8.9468 | -9.2467 | -8.7735   |
| $E_{\text{LUMO}}$                       | -5.4877  | -5.3359 | -5.7051 | -4.9974 | -5.3824 | -5.6616 | -5.3677   |
| $\Delta E_{(\text{LUMO-HOMO})}$         | 3.4327   | 3.9454  | 3.0735  | 4.2488  | 3.5644  | 3.5851  | 3.4058    |
| Ionization potential (IP)               | 8.9204   | 9.2813  | 8.7787  | 9.2462  | 8.9468  | 9.2467  | 8.7735    |
| Electron affinity (A)                   | 5.4877   | 5.3359  | 5.7051  | 4.9974  | 5.3824  | 5.6616  | 5.3677    |
| Electronegativity ( $\chi$ )            | 7.2041   | 7.3086  | 7.2419  | 7.1218  | 7.1646  | 7.4542  | 7.0706    |
| Electronic chemical potential ( $\mu$ ) | -7.2041  | -7.3086 | -7.2419 | -7.1218 | -7.1646 | -7.4542 | -7.0706   |
| Chemical hardness ( $\eta$ )            | 1.7164   | 1.9727  | 1.5368  | 2.1244  | 1.7822  | 1.7925  | 1.7029    |
| Chemical softness ( $\sigma$ )          | 0.2913   | 0.2535  | 0.3254  | 0.2354  | 0.2806  | 0.2789  | 0.2936    |
| Electrophilicity index ( $\omega$ )     | 15.1189  | 13.5387 | 17.0365 | 11.9374 | 14.4012 | 15.4987 | 14.6790   |
| <b>Aqueous solution</b>                 |          |         |         |         |         |         |           |
| $E_{\text{HOMO}}$                       | -8.9153  | -9.2753 | -8.7749 | -9.2475 | -8.9340 | -9.2290 | -8.7555   |
| $E_{\text{LUMO}}$                       | -5.5016  | -5.3484 | -5.7128 | -5.0929 | -5.3919 | -5.6660 | -5.3721   |
| $\Delta E_{(\text{LUMO-HOMO})}$         | 3.4137   | 3.9269  | 3.0621  | 4.1546  | 3.5421  | 3.5631  | 3.3835    |
| Ionization potential (IP)               | 8.9153   | 9.2753  | 8.7749  | 9.2475  | 8.9340  | 9.2290  | 8.7555    |
| Electron affinity (A)                   | 5.5016   | 5.3484  | 5.7128  | 5.0929  | 5.3919  | 5.6660  | 5.3721    |
| Electronegativity ( $\chi$ )            | 7.2084   | 7.3118  | 7.2438  | 7.1702  | 7.1630  | 7.4475  | 7.0638    |
| Electronic chemical potential ( $\mu$ ) | -7.2084  | -7.3118 | -7.2438 | -7.1702 | -7.1630 | -7.4475 | -7.0638   |
| Chemical hardness ( $\eta$ )            | 1.7068   | 1.9634  | 1.5310  | 2.0773  | 1.7711  | 1.7815  | 1.6917    |
| Chemical softness ( $\sigma$ )          | 0.2929   | 0.2547  | 0.3266  | 0.2407  | 0.2823  | 0.2807  | 0.2956    |
| Electrophilicity index ( $\omega$ )     | 15.2216  | 13.6146 | 17.1362 | 12.3746 | 14.4853 | 15.5667 | 14.7474   |
| <b>Methanolic solution</b>              |          |         |         |         |         |         |           |
| $E_{\text{HOMO}}$                       | -8.9155  | -9.2755 | -8.7751 | -9.2475 | -8.9343 | -9.2296 | -8.7550   |
| $E_{\text{LUMO}}$                       | -5.5011  | -5.3479 | -5.7125 | -5.0893 | -5.3917 | -5.6660 | -5.3723   |
| $\Delta E_{(\text{LUMO-HOMO})}$         | 3.4145   | 3.9277  | 3.0626  | 4.1582  | 3.5427  | 3.5636  | 3.3826    |
| Ionization potential (IP)               | 8.9155   | 9.2755  | 8.7751  | 9.2475  | 8.9343  | 9.2296  | 8.7550    |
| Electron affinity (A)                   | 5.5011   | 5.3479  | 5.7125  | 5.0893  | 5.3917  | 5.6660  | 5.3723    |
| Electronegativity ( $\chi$ )            | 7.2083   | 7.3117  | 7.2438  | 7.1684  | 7.1630  | 7.4478  | 7.0637    |
| Electronic chemical potential ( $\mu$ ) | -7.2083  | -7.3117 | -7.2438 | -7.1684 | -7.1630 | -7.4478 | -7.0637   |
| Chemical hardness ( $\eta$ )            | 1.7072   | 1.9638  | 1.5313  | 2.0791  | 1.7713  | 1.7818  | 1.6913    |
| Chemical softness ( $\sigma$ )          | 0.2929   | 0.2546  | 0.3265  | 0.2405  | 0.2832  | 0.2806  | 0.2956    |
| Electrophilicity index ( $\omega$ )     | 15.2174  | 13.6113 | 17.1332 | 12.3579 | 14.4831 | 15.5654 | 14.7504   |



**Table S3.** The values of aromaticity indexes of the tested acids (Aj, BAC, HOMA, GEO, EN, I6, NICS) calculated for structures optimized in the gas and water phase using the B3LYP / 6-311 ++ G (d,p) method.

|                       | <b>2,3-DHB</b> | <b>2,4-DHB</b> | <b>2,5-DHB</b> | <b>2,6-DHB</b> | <b>3,4-DHB</b> | <b>3,5-DHB</b> | <b>3,4,5-THB</b> |
|-----------------------|----------------|----------------|----------------|----------------|----------------|----------------|------------------|
| <b>Gas phase</b>      |                |                |                |                |                |                |                  |
| Aj                    | 0.987          | 0.989          | 0.990          | 0.998          | 0.995          | 0.999          | 0.997            |
| BAC                   | 0.859          | 0.881          | 0.893          | 0.969          | 0.898          | 0.898          | 0.921            |
| HOMA                  | 0.944          | 0.949          | 0.956          | 0.983          | 0.975          | 0.986          | 0.980            |
| GEO                   | 0.030          | 0.025          | 0.022          | 0.003          | 0.011          | 0.002          | 0.008            |
| EN                    | 0.026          | 0.026          | 0.022          | 0.014          | 0.013          | 0.013          | 0.012            |
| I6                    | 90.91          | 91.83          | 92.31          | 97.17          | 94.41          | 97.96          | 95.41            |
| NICS                  | -10.2616       | -9.3056        | -10.0787       | -10.2780       | -10.2731       | -10.0251       | -11.5274         |
| <b>Water solution</b> |                |                |                |                |                |                |                  |
| Aj                    | 0.985          | 0.986          | 0.988          | 0.997          | 0.993          | 0.999          | 0.996            |
| BAC                   | 0.850          | 0.859          | 0.879          | 0.958          | 0.878          | 0.975          | 0.916            |
| HOMA                  | 0.936          | 0.936          | 0.948          | 0.974          | 0.967          | 0.983          | 0.975            |
| GEO                   | 0.033          | 0.032          | 0.026          | 0.006          | 0.016          | 0.001          | 0.008            |
| EN                    | 0.031          | 0.032          | 0.026          | 0.020          | 0.017          | 0.016          | 0.016            |
| I6                    | 90.42          | 90.63          | 91.58          | 95.92          | 93.32          | 98.54          | 95.16            |
| NICS                  | -10.0741       | -9.0564        | -9.9075        | -10.0358       | -10.2185       | -10.0103       | -11.3553         |

**Table S4.** The distribution of electronic charges (calculated ChelpG and NBO) for dihydroxybenzoic acids and trihydroxybenzoic acid (gallic);  $\Sigma \bar{e}$  ring - total charge of the ring;  $\Sigma \bar{e}$  COO<sup>-</sup> - total charge of the carboxylic anion

|                  | 2,3-DHB |        | 2,4-DHB |        | 2,5-DHB |        | 2,6-DHB |        | 3,4-DHB |        | 3,5-DHB |        | 3,4,5-THB |        |
|------------------|---------|--------|---------|--------|---------|--------|---------|--------|---------|--------|---------|--------|-----------|--------|
|                  | NBO     | ChelpG | NBO       | ChelpG |
| Gas phase        |         |        |         |        |         |        |         |        |         |        |         |        |           |        |
| C1               | -0.206  | -0.115 | -0.245  | -0.221 | -0.198  | -0.071 | -0.234  | -0.330 | -0.175  | -0.074 | -0.127  | 0.024  | -0.157    | -0.049 |
| C2               | 0.330   | 0.269  | 0.387   | 0.413  | 0.343   | 0.334  | 0.360   | 0.441  | -0.189  | -0.281 | -0.234  | -0.345 | -0.210    | -0.314 |
| C3               | 0.245   | 0.259  | -0.337  | -0.440 | -0.261  | -0.288 | -0.306  | -0.388 | 0.273   | 0.365  | 0.332   | 0.544  | 0.285     | 0.344  |
| C4               | -0.244  | -0.248 | 0.357   | 0.515  | -0.200  | -0.135 | -0.157  | 0.056  | 0.274   | 0.255  | -0.336  | -0.544 | 0.231     | 0.135  |
| C5               | -0.219  | -0.082 | -0.314  | -0.384 | 0.284   | 0.382  | -0.307  | -0.382 | -0.270  | -0.269 | 0.331   | 0.544  | 0.259     | 0.287  |
| C6               | -0.168  | -0.178 | -0.119  | -0.001 | -0.222  | -0.322 | 0.358   | 0.458  | -0.170  | -0.096 | -0.242  | -0.351 | -0.256    | -0.328 |
| Σē ring          | -0.262  | -0.095 | -0.271  | -0.118 | -0.254  | -0.100 | -0.286  | -0.145 | -0.257  | -0.100 | -0.276  | -0.128 | 0.152     | 0.075  |
| C7               | 0.785   | 0.763  | 0.784   | 0.775  | 0.784   | 0.746  | 0.815   | 0.992  | 0.789   | 0.772  | 0.791   | 0.767  | 0.788     | 0.796  |
| O1               | -0.577  | -0.555 | -0.584  | -0.560 | -0.574  | -0.545 | -0.571  | -0.625 | -0.603  | -0.596 | -0.595  | -0.651 | -0.600    | -0.601 |
| O2               | -0.702  | -0.634 | -0.708  | -0.664 | -0.707  | -0.638 | -0.672  | -0.639 | -0.694  | -0.650 | -0.687  | -0.587 | -0.698    | -0.650 |
| Σē               | -0.494  | -0.426 | -0.508  | -0.449 | -0.497  | -0.437 | -0.428  | -0.272 | -0.508  | -0.474 | -0.491  | -0.471 | -0.510    | -0.455 |
| COO <sup>-</sup> |         |        |         |        |         |        |         |        |         |        |         |        |           |        |
| O3               | -0.635  | -0.528 | -0.632  | -0.535 | -0.640  | -0.557 | -0.662  | -0.615 | -0.668  | -0.606 | -0.665  | -0.644 | -0.665    | -0.575 |
| O4               | -0.707  | -0.647 | -0.662  | -0.611 | -0.677  | -0.632 | -0.665  | -0.633 | -0.698  | -0.636 | -0.665  | -0.634 | -0.695    | -0.585 |
| O5               |         |        |         |        |         |        |         |        |         |        |         |        | -0.705    | -0.625 |
| Water solution   |         |        |         |        |         |        |         |        |         |        |         |        |           |        |
| C1               | -0.219  | -0.164 | -0.259  | -0.278 | -0.210  | -0.120 | -0.260  | -0.401 | -0.186  | -0.100 | -0.137  | 0.001  | -0.166    | -0.074 |
| C2               | 0.326   | 0.295  | 0.385   | 0.461  | 0.342   | 0.382  | 0.359   | 0.460  | -0.202  | -0.289 | -0.245  | -0.366 | -0.224    | -0.325 |
| C3               | 0.252   | 0.267  | -0.338  | -0.472 | -0.258  | -0.308 | -0.307  | -0.395 | 0.267   | 0.360  | 0.331   | 0.558  | 0.278     | 0.346  |
| C4               | -0.234  | -0.238 | 0.362   | 0.546  | -0.201  | -0.141 | -0.154  | 0.057  | 0.287   | 0.280  | -0.321  | -0.547 | 0.238     | 0.136  |
| C5               | -0.220  | -0.094 | -0.308  | -0.388 | 0.282   | 0.401  | -0.307  | -0.392 | -0.265  | -0.269 | 0.331   | 0.560  | 0.257     | 0.309  |
| C6               | -0.176  | -0.181 | -0.122  | -0.004 | -0.221  | -0.332 | 0.358   | 0.484  | -0.169  | -0.103 | -0.250  | -0.363 | -0.249    | -0.332 |
| Σē ring          | -0.271  | -0.115 | -0.280  | -0.135 | -0.266  | -0.188 | -0.311  | -0.187 | -0.268  | -0.212 | -0.291  | -0.157 | 0.134     | 0.060  |
| C7               | 0.799   | 0.824  | 0.795   | 0.832  | 0.797   | 0.804  | 0.824   | 1.031  | 0.799   | 0.815  | 0.803   | 0.814  | 0.800     | 0.840  |
| O1               | -0.633  | -0.637 | -0.642  | -0.645 | -0.630  | -0.630 | -0.620  | -0.690 | -0.650  | -0.664 | -0.638  | -0.650 | -0.648    | -0.669 |
| O2               | -0.697  | -0.650 | -0.704  | -0.676 | -0.700  | -0.650 | -0.676  | -0.664 | -0.692  | -0.665 | -0.686  | -0.663 | -0.691    | -0.664 |
| Σē               | -0.531  | -0.463 | -0.551  | -0.489 | -0.533  | -0.476 | -0.472  | -0.323 | -0.543  | -0.514 | -0.521  | -0.499 | -0.539    | -0.493 |
| COO <sup>-</sup> |         |        |         |        |         |        |         |        |         |        |         |        |           |        |
| O3               | -0.664  | -0.587 | -0.661  | -0.604 | -0.668  | -0.622 | -0.684  | -0.656 | -0.689  | -0.643 | -0.685  | -0.679 | -0.687    | -0.614 |
| O4               | -0.713  | -0.662 | -0.675  | -0.652 | -0.696  | -0.681 | -0.684  | -0.675 | -0.698  | -0.645 | -0.686  | -0.686 | -0.696    | -0.586 |
| O5               |         |        |         |        |         |        |         |        |         |        |         |        | -0.705    | -0.635 |

**Table S5.** Wavenumbers [cm<sup>-1</sup>], intensities and assignments of bands occurring in the experimental FT-IR of hydroxybenzoic acids.

| 2,3-DHB | 2,4-DHB | 2,5-DHB | 2,6-DHB | 3,4-DHB | 3,5-DHB | 3,4,5-THB | Assignment | No. of the aromatic ring vibrations [110] |
|---------|---------|---------|---------|---------|---------|-----------|------------|-------------------------------------------|
| 3375 s  | 3374 s  | 3313 s  | 3414 m  | 3338 s  | 3214 vs | 3368 vs   | v(OH)      | 20b                                       |
| 3048 m  | 3031 m  | 2924 m  | 3048 m  | 2966 m  | 3007 m  | 3013 m    | v(CH)      |                                           |
| 2861-   | 2861-   | 2878-   | 2824-   | 2851-   | 2841-   | 2845-     | v(OH)      |                                           |
| 2578    | 2555    | 2578    | 2545    | 2585    | 2504    | 2574      |            |                                           |
| 1676 s  | 1639 vs | 1669 vs | 1676 vs | 1671 vs | 1688 vs | 1704 vs   | v(C=O)     |                                           |
|         |         | 1619 s  | 1630 s  | 1602 vs | 1609 vs | 1619 s    | v(CC)      | 8b                                        |
| 1599 m  |         | 1603 sh | 1579 m  |         |         |           | v(CC)      | 8a                                        |
|         | 1521 m  | 1500 m  |         | 1525 m  | 1510 m  | 1541 m    | v(CC)      | 19b                                       |
| 1474 vs | 1448 s  | 1445 vs | 1474 s  | 1443 s  | 1480 s  |           | v(CC)      | 19a                                       |
| 1433 m  | 1409 m  | 1385 m  | 1419 s  | 1419 s  | 1416 s  | 1446 s    | β(OH)      |                                           |
| 1353 m  | 1348 m  | 1317 w  | 1354 m  | 1341 sh | 1334 vs | 1340 vs   | v(CC)      | 14                                        |
| 1302 s  | 1280 m  | 1278 m  | 1280 m  |         | 1305 s  | 1310 s    | β(CH)      | 3                                         |
|         |         | 1238 s  | 1229 m  |         |         |           | v(CH)      | 7a                                        |
| 1258 vs | 1232 vs | 1198 vs | 1194 s  | 1283 vs | 1263 m  | 1249 vs   | vC-(OH)    |                                           |
| 1235 s  |         |         |         | 1241 s  | 1208 m  |           | β(OH)      |                                           |
|         | 1193 sh |         | 1125 m  |         |         | 1207 m    | v(CH)      | 13                                        |
| 1159 s  | 1156 m  |         | 1160 m  | 1190 s  | 1164 vs |           | β(CH)      | 18a                                       |
| 1069 m  | 1091 m  | 1078 w  | 1068 w  | 1122 m  | 1109 sh | 1102 w    | β(CH)      | 18b                                       |
| 943 w   | 976 m   | 931 m   | 1031 m  | 942 m   | 1007 s  | 1025 s    | v(CH)      | 7b                                        |
|         | 881 m   | 861 m   |         |         | 916 m   | 891 sh    | γ(OH)      |                                           |
| 831 w   | 848 m   | 844 m   | 809 s   | 890 w   | 851 m   | 865 m     | γ(CH)      | 11                                        |
| 795 w   | 775 m   | 795 s   | 768 m   | 769 m   | 766 m   | 765 w     | α(CCC)     | 12                                        |
| 746 s   | 693 m   | 755 m   | 724 sh  |         | 728 s   |           | β(C=O)     |                                           |
| 686 m   | 620 m   | 725 m   | 691 s   | 642 m   | 698 m   | 703 m     | γ(C=O)     |                                           |
| 633 m   | 603 sh  |         | 588 m   | 605 sh  | 623 w   | 576 m     | γ(OH)      |                                           |
| 507 m   | 531 w   | 555 m   | 533 w   | 558 w   | 565 w   |           | α(CCC)     | 6a                                        |
|         | 480 w   |         |         |         | 531 vw  |           | φ(CC)      | 16b                                       |
| 453 m   | 449 w   | 470 m   | 459 w   | 452 m   | 471 m   | 442 w     | v CCC)     | 6b                                        |
| 419 w   |         | 415 w   | 424 w   |         |         |           | β(CH)      | 9b                                        |

\* fundamental modes of the phenyl ring are numbered according to Varsányi [110]; s – strong; m – medium; w – weak; v – very; sh – shoulder; v: stretching; : in-plane deformations; : out of plane deformations; α: the aromatic ring in-plane bending modes; φ: the aromatic ring out-of-plane ones

**Table S6.** Chemical shifts  $\delta$  [ppm] from the  $^1\text{H}$  and  $^{13}\text{C}$  NMR spectra of hydroxybenzoic acids.

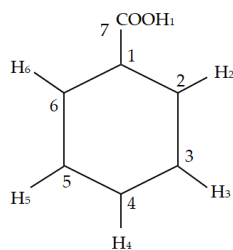

| No.                 | 2,3-DHB | 2,4-DHB | 2,5-DHB | 2,6-DHB | 3,4-DHB | 3,5-DHB [114] | 3,4,5-THB |
|---------------------|---------|---------|---------|---------|---------|---------------|-----------|
| $\delta_{\text{H}}$ |         |         |         |         |         |               |           |
| 1 (COOH)            | 11.40   | 11.42   | 10.70   | 10.48   | 12.28   | 12.60         | 12.20     |
| 2                   | 9.28    | 10.30   | 9.15    | 10.48   | 7.34    | 6.85          | 6.91      |
| 3                   | 9.28    | 6.27    | 6.78    | 6.34    | 9.64    | 9.60          | 9.17      |
| 4                   | 7.01    | 10.30   | 6.96    | 7.22    | 9.28    | 6.46          | 8.86      |
| 5                   | 6.71    | 6.34    | 9.15    | 6.34    | 6.78    | 9.60          | 9.17      |
| 6                   | 7.24    | 7.62    | 7.17    | 10.48   | 7.29    | 6.85          | 6.91      |
| $\delta_{\text{C}}$ |         |         |         |         |         |               |           |
| 1                   | 113.18  | 107.97  | 112.69  | 102.32  | 121.71  | 132.48        | 120.46    |
| 2                   | 150.44  | 164.05  | 154.22  | 160.62  | 116.61  | 107.31        | 108.73    |
| 3                   | 145.95  | 102.30  | 114.67  | 106.34  | 144.94  | 158.35        | 145.42    |
| 4                   | 120.00  | 163.42  | 123.85  | 134.67  | 150.06  | 106.81        | 138.00    |
| 5                   | 118.61  | 104.38  | 149.48  | 106.94  | 115.22  | 158.35        | 145.42    |
| 6                   | 120.76  | 131.91  | 117.86  | 160.62  | 121.97  | 107.31        | 108.73    |
| 7 (COOH)            | 172.49  | 171.90  | 171.82  | 172.36  | 167.45  | 167.31        | 167.48    |

**Table S7.** Pearson correlation coefficient matrix between lipophilic, electronic parameters, aromaticity indices, FT-IR and NMR parameters of the selected dihydroxybenzoates. The determined correlation coefficients are significant with  $p < 0.05000$   $N = 7$  (missing data were removed by case).

| Variable              | LogP <sub>C18</sub> | LogP <sub>Galas</sub> | LogP <sub>exp</sub> | pK <sub>a1</sub>   | ΔE (LUMO-HOMO)     | IP                 | BAC                | HOMA               | I6                 | NICS               | NBO                | νC-(OH)            | β(CH) 18b          | γ(CH) 11           | δC2                | δC3 |
|-----------------------|---------------------|-----------------------|---------------------|--------------------|--------------------|--------------------|--------------------|--------------------|--------------------|--------------------|--------------------|--------------------|--------------------|--------------------|--------------------|-----|
| LogP <sub>Galas</sub> | 0.8820<br>p=0.009   |                       |                     |                    |                    |                    |                    |                    |                    |                    |                    |                    |                    |                    |                    |     |
| LogP <sub>exp</sub>   | 0.7741<br>p=0.041   | 0.9653<br>p=0.000     |                     |                    |                    |                    |                    |                    |                    |                    |                    |                    |                    |                    |                    |     |
| pK <sub>a1</sub>      | -0.7842<br>p=0.037  | -0.9186<br>p=0.003    | -0.9177<br>p=0.004  |                    |                    |                    |                    |                    |                    |                    |                    |                    |                    |                    |                    |     |
| ΔE (LUMO-HOMO)        | 0.7318<br>p=0.062   | 0.6250<br>p=0.133     | 0.4831<br>p=0.272   | -0.5346<br>p=0.216 |                    |                    |                    |                    |                    |                    |                    |                    |                    |                    |                    |     |
| IP                    | 0.7954<br>p=0.032   | 0.5273<br>p=0.224     | 0.3621<br>p=0.425   | -0.3590<br>p=0.429 | 0.8234<br>p=0.023  |                    |                    |                    |                    |                    |                    |                    |                    |                    |                    |     |
| BAC                   | 0.3066<br>p=0.504   | 0.3226<br>p=0.480     | 0.3932<br>p=0.383   | -0.4727<br>p=0.284 | 0.5573<br>p=0.194  | 0.2295<br>p=0.621  |                    |                    |                    |                    |                    |                    |                    |                    |                    |     |
| HOMA                  | -0.0288<br>p=0.951  | -0.2700<br>p=0.558    | -0.2367<br>p=0.609  | 0.1225<br>p=0.794  | 0.2661<br>p=0.564  | 0.1845<br>p=0.692  | 0.7359<br>p=0.059  |                    |                    |                    |                    |                    |                    |                    |                    |     |
| I6                    | 0.1617<br>p=0.729   | -0.1256<br>p=0.788    | -0.1199<br>p=0.798  | -0.0179<br>p=0.970 | 0.3750<br>p=0.407  | 0.3725<br>p=0.411  | 0.7293<br>p=0.063  | 0.9672<br>p=0.000  |                    |                    |                    |                    |                    |                    |                    |     |
| NICS                  | 0.6804<br>p=0.093   | 0.5767<br>p=0.175     | 0.4717<br>p=0.285   | -0.2650<br>p=0.566 | 0.3066<br>p=0.504  | 0.6373<br>p=0.124  | -0.3480<br>p=0.444 | -0.4585<br>p=0.301 | -0.3079<br>p=0.502 |                    |                    |                    |                    |                    |                    |     |
| NBO                   | -0.6200<br>p=0.137  | -0.3083<br>p=0.501    | -0.0597<br>p=0.899  | 0.1685<br>p=0.718  | -0.7059<br>p=0.076 | -0.7746<br>p=0.041 | 0.0216<br>p=0.963  | -0.0570<br>p=0.903 | -0.1757<br>p=0.706 | -0.4795<br>p=0.276 |                    |                    |                    |                    |                    |     |
| νC-(OH)               | -0.4738<br>p=0.283  | -0.7437<br>p=0.055    | -0.8806<br>p=0.009  | 0.8057<br>p=0.029  | -0.2218<br>p=0.633 | -0.0945<br>p=0.840 | -0.4870<br>p=0.268 | 0.1016<br>p=0.828  | 0.0168<br>p=0.972  | -0.1586<br>p=0.734 | -0.3588<br>p=0.429 |                    |                    |                    |                    |     |
| β(CH) 18b             | -0.4878<br>p=0.267  | -0.7318<br>p=0.062    | -0.7537<br>p=0.050  | 0.8650<br>p=0.012  | -0.1656<br>p=0.723 | -0.0281<br>p=0.952 | -0.1077<br>p=0.818 | 0.4665<br>p=0.291  | 0.3420<br>p=0.453  | -0.1467<br>p=0.754 | -0.0724<br>p=0.877 | 0.7323<br>p=0.061  |                    |                    |                    |     |
| γ(CH) 11              | -0.7027<br>p=0.078  | -0.7842<br>p=0.037    | -0.7648<br>p=0.045  | 0.9254<br>p=0.003  | -0.4300<br>p=0.336 | -0.3708<br>p=0.413 | -0.3211<br>p=0.483 | 0.1593<br>p=0.733  | -0.0285<br>p=0.952 | -0.2127<br>p=0.647 | 0.1593<br>p=0.733  | 0.7206<br>p=0.068  | 0.9035<br>p=0.005  |                    |                    |     |
| δC2                   | 0.6404<br>p=0.121   | 0.8973<br>p=0.006     | 0.8873<br>p=0.008   | -0.7858<br>p=0.036 | 0.3421<br>p=0.453  | 0.2514<br>p=0.587  | -0.0108<br>p=0.982 | -0.6424<br>p=0.120 | -0.5338<br>p=0.217 | 0.5741<br>p=0.178  | -0.0959<br>p=0.838 | -0.7058<br>p=0.076 | -0.8039<br>p=0.029 | -0.6828<br>p=0.091 |                    |     |
| δC3                   | -0.5492<br>p=0.202  | -0.8310<br>p=0.021    | -0.8866<br>p=0.008  | 0.6771<br>p=0.095  | -0.4514<br>p=0.309 | -0.2943<br>p=0.522 | -0.3046<br>p=0.507 | 0.3280<br>p=0.473  | 0.2696<br>p=0.559  | -0.4692<br>p=0.288 | -0.0707<br>p=0.880 | 0.8090<br>p=0.028  | 0.5439<br>p=0.207  | 0.4877<br>p=0.267  | -0.8545<br>p=0.014 |     |

**Table S8.** PCA factor loadings, eigenvalues and explained percentage of variance.

|                               | PC1   | PC2   | PC3   |
|-------------------------------|-------|-------|-------|
| pK <sub>a1</sub>              | 0.94  | -0.05 | 0.25  |
| γ(CH) 11                      | 0.84  | -0.01 | 0.21  |
| δC3                           | 0.82  | 0.19  | 0.12  |
| νC-(OH)                       | 0.78  | 0.15  | 0.54  |
| β(CH) 18b                     | 0.78  | 0.38  | 0.27  |
| NBO (Σē ring)                 | 0.27  | -0.50 | -0.74 |
| HOMA                          | 0.26  | 0.88  | -0.38 |
| I6                            | 0.10  | 0.92  | -0.29 |
| BAC                           | -0.33 | 0.68  | -0.61 |
| IP                            | -0.53 | 0.60  | 0.53  |
| NICS                          | -0.54 | -0.12 | 0.71  |
| ΔE <sub>(LUMO-HOMO)</sub>     | -0.62 | 0.64  | 0.23  |
| LogP <sub>C18</sub>           | -0.87 | 0.33  | 0.29  |
| δC2                           | -0.89 | -0.42 | 0.08  |
| LogP <sub>exp.</sub>          | -0.96 | -0.08 | -0.17 |
| LogP <sub>Galas</sub>         | -0.99 | -0.00 | 0.04  |
| Eigenvalue                    | 8.16  | 3.61  | 2.61  |
| Explained variance            | 51.0% | 22.6% | 16.3% |
| Cumulative eigenvalue         | 8.16  | 11.77 | 14.38 |
| Cumulative explained variance | 51.0% | 73.6% | 89.9% |
